# Supplementary material for: Does Protein Supplementation Support Adaptations to Arduous Concurrent Exercise Training? A Systematic Review and Meta-Analysis with Military Based Applications
Source: MDPI journal article supplement (doi:10.3390/nu13051416), 2021-04-23
Supplement: s1 [file s1]

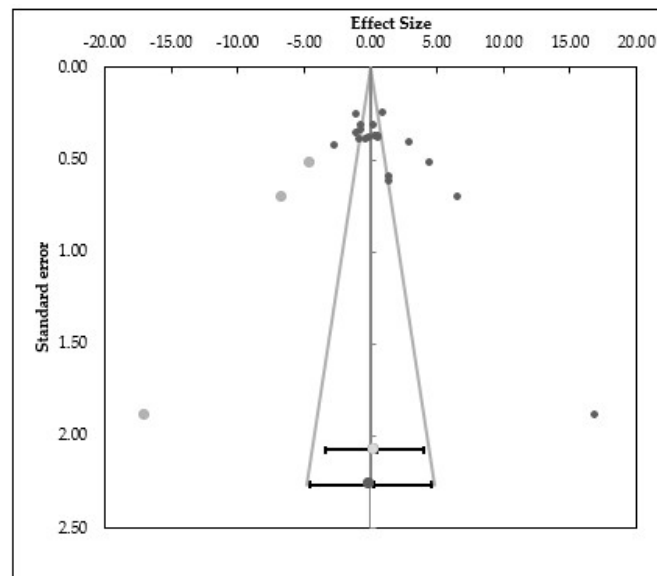

**Supplementary Figure S1.** Funnel plot of the comparison of the effect of protein supplementation vs. placebo on muscle strength, aerobic endurance, fat free mass (FFM) and fat-mass (FM) adaptations. All studies are included.

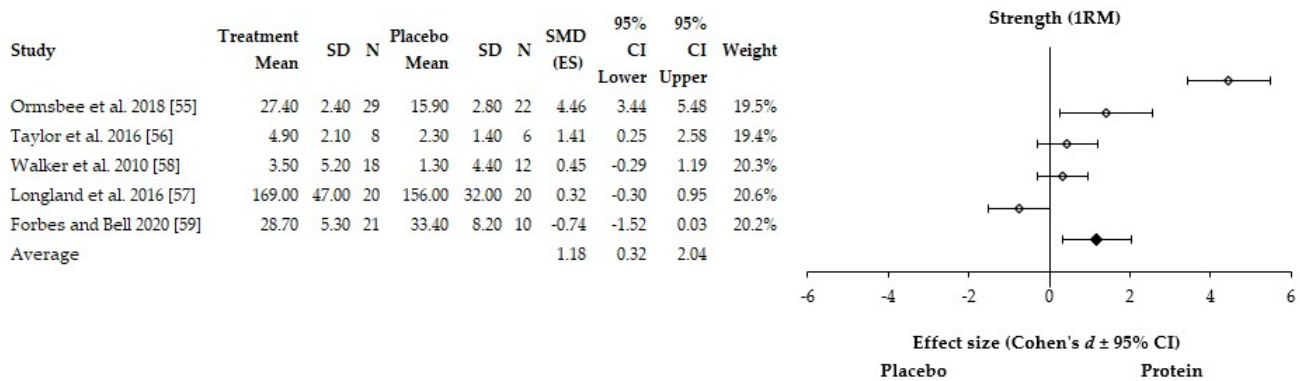

**Supplementary Figure S2.** Forest plot showing the effect sizes of the studies which assessed the effects of protein supplementation on muscle strength adaptations.

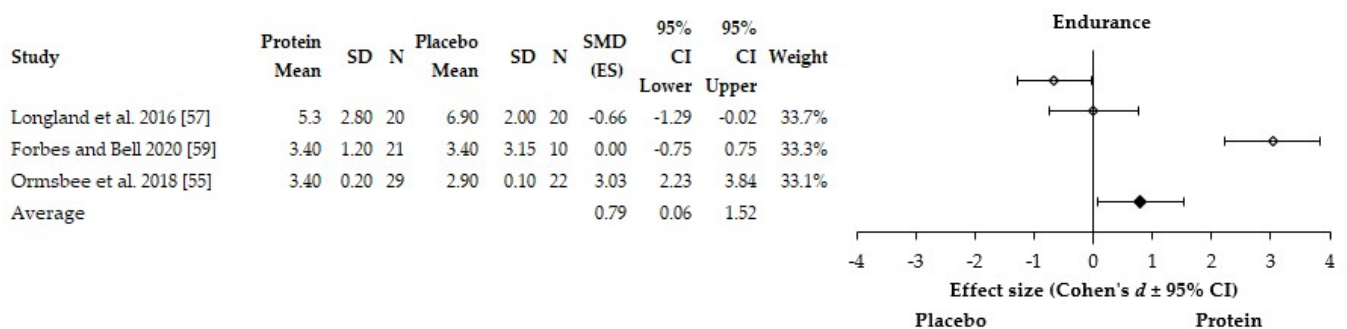

**Supplementary Figure S3.** Forest plot showing the effect sizes of the studies which assessed the effects of protein supplementation on aerobic endurance adaptations.

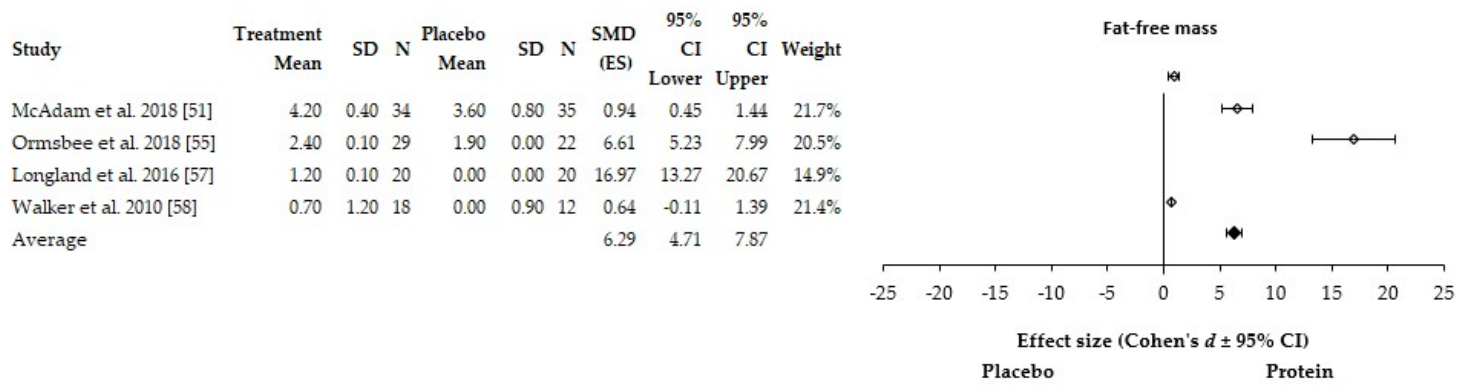

**Supplementary Figure S4.** Forest plot showing the effect sizes of the studies which assessed the effects of protein supplementation on fat-free mass (FFM) changes in response to concurrent training.

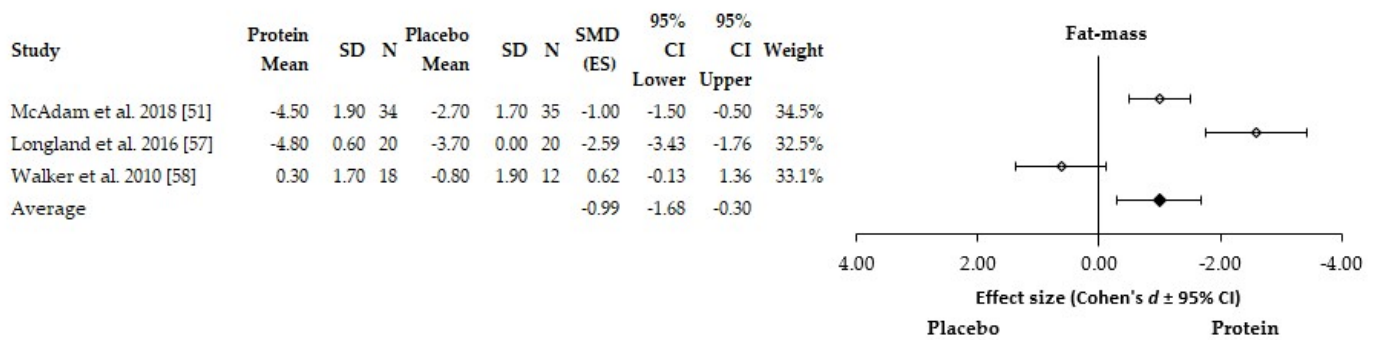

**Supplementary Figure S5.** Forest plot showing the effect sizes of the studies which assessed the effects of protein supplementation on fat-mass (FM) changes in response to concurrent training.
